# Supplementary material for: Discovery of a novel brown algal genus and species Setoutiphycus delamareoides (Phaeophyceae, Ectocarpales) from the Seto Inland Sea, Japan
Source: Research Square preprint supplement (doi:10.21203/rs.3.rs-244391/v1), 2021-02-26
Supplement: Supplementary file 1 [file 3e0dbeb31086819db30518a3.pdf]

## Supplementary Information

### **Discovery of a novel brown algal genus and species *Setoutiphycus delamareoides* (Phaeophyceae, Ectocarpales) from the Seto Inland Sea, Japan**

Hiroshi Kawai<sup>1,\*</sup>, Takeaki Hanyuda<sup>1</sup>

<sup>1</sup>Kobe University Research Center for Inland Seas, Rokkodai, Kobe 657-8501, Japan

\*kawai@kobe-u.ac.jp

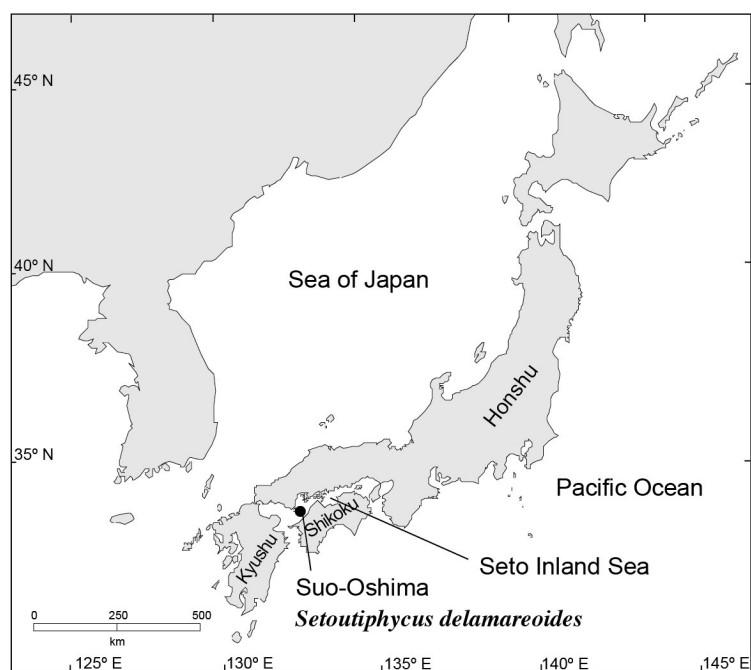

### Supplementary Information 1

Map showing the collection site of *Setoutiphyicus delamareoides* (Suo-Oshima, Yamaguchi Pref. in the Seto Inland Sea, Japan).

**Supplementary Information 2.** Origin of specimens and sequence data used for molecular analyses of chloroplast and mitochondrial genes, including their database accession numbers. Sample codes [KU-####] correspond to KU-MACC (Kobe University Macroalgal Culture Collection) strain codes, and [KU-d####] corresponds to silica-gel dried specimens housed at Kobe University Research Center for Inland Seas. Accession codes of newly determined sequences in the present study are indicated in bold.

| Species                               | Origin                               | Locality                    | Name of sequenced genes and their accession code |             |             |             |             |                 |
|---------------------------------------|--------------------------------------|-----------------------------|--------------------------------------------------|-------------|-------------|-------------|-------------|-----------------|
|                                       |                                      |                             | <i>cox1</i>                                      | <i>cox3</i> | <i>atpB</i> | <i>psaA</i> | <i>psbA</i> | <i>rbcL</i>     |
| <b>Asterocladales</b>                 |                                      |                             |                                                  |             |             |             |             |                 |
| <i>Asterocladon lobatum</i>           | KU-1881                              | São Paulo, Brazil           | -                                                | -           | -           | -           | -           | <b>LC603806</b> |
| <i>Asterocladon rhodochortonoides</i> | Uwai <i>et al.</i> (2005)            | Tsuyazaki, Fukuoka, Japan   | -                                                | -           | -           | -           | -           | AB102867        |
| <b>Ectocarpales</b>                   |                                      |                             |                                                  |             |             |             |             |                 |
| <b>Acinetosporaceae</b>               |                                      |                             |                                                  |             |             |             |             |                 |
| <i>Acinetospora asiatica</i>          | Yaegashi <i>et al.</i> (2015)        | Innoshima, Hiroshima, Japan | -                                                | -           | -           | -           | -           | LC060517        |
| <i>Feldmannia irregularis</i>         | Siemer & Pedersen (only in database) | unknown                     | -                                                | -           | -           | -           | -           | AF207800        |
| <i>Geminocarpus austrogeorgiae</i>    | Peters & Ramírez (2001)              | unknown                     | -                                                | -           | -           | -           | -           | AJ295830        |
| <i>Herponema velutinum</i>            | Silberfeld <i>et al.</i> (2014)      | unknown                     | -                                                | -           | -           | -           | -           | JF796585        |
| <i>Hincksia hincksiae</i>             | Siemer & Pedersen (only in database) | unknown                     | -                                                | -           | -           | -           | -           | AF207803        |
| <i>Pogotrichum filiforme</i>          | Siemer <i>et al.</i> (1998)          | Godthab, Greenland, Denmark | -                                                | -           | -           | -           | -           | AF055409        |
| <i>Pylaiella washingtoniensis</i>     | Kawai <i>et al.</i> (2015)           | San Juan I., WA, USA        | AB899179                                         | AB526446    | AB899197    | AB899222    | AB899265    | AB899288        |
| <b>Adenocystaceae</b>                 |                                      |                             |                                                  |             |             |             |             |                 |
| <i>Adenocystis utricularis</i>        | Peters & Ramírez (2001)              | unknown                     | -                                                | -           | -           | -           | -           | AJ295823        |
| <i>Caepidium antarcticum</i>          | Peters & Ramírez (2001)              | unknown                     | -                                                | -           | -           | -           | -           | AJ295826        |
| <i>Chordariopsis capensis</i>         | Silberfeld <i>et al.</i> (2014)      | unknown                     | -                                                | -           | -           | -           | -           | JF796581        |
| <i>Utriculidium durvillei</i>         | Peters & Ramírez (2001)              | unknown                     | -                                                | -           | -           | -           | -           | AJ295835        |

**Chordariaceae**

|                                     |                                      |                             |                 |                 |                 |                 |                 |                 |
|-------------------------------------|--------------------------------------|-----------------------------|-----------------|-----------------|-----------------|-----------------|-----------------|-----------------|
| <i>Acrothrix pacifica</i>           | Kawai <i>et al.</i> (2016)           | Oshoro, Hokkaido, Japan     | LC107827        | LC107952        | LC107972        | LC107993        | LC108012        | -               |
|                                     | Tanaka <i>et al.</i> (2010)          | Oshoro, Hokkaido, Japan     | -               | -               | -               | -               | -               | AB302285        |
| <i>Ascoseiophila violodora</i>      | Peters (2003)                        | King George I., Antarctica  | -               | -               | -               | -               | -               | AJ439835        |
| <i>Asperococcus bullosus</i>        | Kawai <i>et al.</i> (2016, 2019a)    | Ehime, Japan                | LC205693        | LC016522        | LC205701        | LC205706        | LC205711        | LC016509        |
| <i>Austrofilum incommodum</i>       | Peters (2003)                        | King George I., Antarctica  | -               | -               | -               | -               | -               | AJ439838        |
| <i>Botrytella micromora</i>         | Tanaka <i>et al.</i> (2010)          | unknown                     | -               | -               | -               | -               | -               | AB302288        |
| <i>Chordaria flagelliformis</i>     | Kawai <i>et al.</i> (2015, 2019a)    | Isle of Man, UK             | AB899177        | LC205698        | AB899195        | AB899220        | AB899263        | AB899286        |
| <i>Cladosiphon umezakii</i>         | Kawai <i>et al.</i> (2016)           | Takeno, Hyogo, Japan        | LC107831        | LC016526        | LC107976        | LC107996        | LC108016        | LC016511        |
| <i>Cladothele decaisnei</i>         | Kawai <i>et al.</i> (2016)           | Puerto Williams, Chile      | LC107833        | LC016527        | LC016527        | LC107998        | LC108018        | LC016512        |
| <i>Coelocladia arctica</i>          | Kawai <i>et al.</i> (2016)           | Oshoro, Hokkaido, Japan     | LC107834        | LC016528        | LC107979        | LC107999        | LC108019        | -               |
|                                     | Siemer <i>et al.</i> (1998)          | Godthab, Greenland, Denmark | -               | -               | -               | -               | -               | AF055395        |
| <i>Coilodesme japonica</i>          | Tanaka <i>et al.</i> (2010)          | Muroran, Hokkaido, Japan    | -               | -               | -               | -               | -               | AB302295        |
| <i>Delamarea attenuata</i>          | KU-d5871                             | Abashiri, Hokkaido, Japan   | <b>LC603790</b> | <b>LC603793</b> | <b>LC603797</b> | <b>LC603800</b> | <b>LC603803</b> | <b>LC603807</b> |
| <i>Dictyosiphon foeniculaceus</i>   | Kawai <i>et al.</i> (2019a)          | Newfoundland, Canada        | -               | LC205699        | LC205702        | LC205707        | LC205712        | LC205714        |
|                                     | Silberfeld <i>et al.</i> (2014)      | unknown                     | JF796539        | -               | -               | -               | -               | -               |
| <i>Elachista flaccida</i>           | Silberfeld <i>et al.</i> (2014)      | unknown                     | JF796541        | JF796556        | JF796631        | JF796601        | JF796615        | JF796583        |
| <i>Elachista fucicola</i>           | Siemer <i>et al.</i> (1998)          | Godthab, Greenland, Denmark | -               | -               | -               | -               | -               | AF055398        |
| <i>Eudesme virescens</i>            | Kawai <i>et al.</i> (2019a)          | Roscoff, Brittany, France   | LC201528        | LC201560        | LC201534        | LC201540        | LC201546        | LC201554        |
| <i>Giraudia sphacelarioides</i>     | Siemer <i>et al.</i> (1998)          | Arrieta, Lanzarote, Spain   | -               | -               | -               | -               | -               | AF055399        |
| <i>Halothrix lumbricalis</i>        | Siemer & Pedersen (only on database) | unknown                     | -               | -               | -               | -               | -               | AF207801        |
| <i>Haplospora globosa</i>           | Siemer <i>et al.</i> (1998)          | Godhavn, Greenland, Denmark | -               | -               | -               | -               | -               | AF055400        |
| <i>Hecatonema</i> sp.               | Siemer <i>et al.</i> (1998)          | Hvidøre, Denmark            | -               | -               | -               | -               | -               | AF055401        |
| <i>Hummia onusta</i>                | Siemer <i>et al.</i> (1998)          | Florida, USA                | -               | -               | -               | -               | -               | AF055402        |
| <i>Isthmoplea sphaerophora</i>      | Siemer <i>et al.</i> (1998)          | Godthab, Greenland, Denmark | -               | -               | -               | -               | -               | AF055403        |
| <i>Kurogiella saxatilis</i>         | Tanaka <i>et al.</i> (2010)          | St. Lawrence I., AK, USA    | -               | -               | -               | -               | -               | AB302308        |
| <i>Laminariocolax tomentosoides</i> | Siemer <i>et al.</i> (1998)          | Helgoland, Germany          | -               | -               | -               | -               | -               | AF055404        |

|                                                               |                                      |                               |                 |                 |                 |                 |                 |                 |
|---------------------------------------------------------------|--------------------------------------|-------------------------------|-----------------|-----------------|-----------------|-----------------|-----------------|-----------------|
| <i>Laminarionema elsbetiae</i>                                | Kawai <i>et al.</i> (2016)           | Helgoland, Germany            | LC107836        | LC016534        | LC107982        | LC108002        | LC108022        | -               |
|                                                               | Peters (2003)                        | Helgoland, Germany            | -               | -               | -               | -               | -               | AJ439858        |
| <i>Leathesia marina</i>                                       | Kawai <i>et al.</i> (2016)           | Ashigezaki, Aomori, Japan     | LC107837        | LC107964        | LC107983        | LC108003        | LC108023        | LC108037        |
| <i>Leptonematella fasciculata</i>                             | Kawai <i>et al.</i> (2016)           | Coquimbo, La Herradura, Chile | -               | -               | -               | -               | -               | LC016518        |
| <i>Litosiphon laminariae</i>                                  | Siemer <i>et al.</i> (1998)          | Frederikshavn, Denmark        | -               | -               | -               | -               | -               | AF055406        |
| <i>Mesogloia vermiculata</i>                                  | Kawai <i>et al.</i> (2016)           | Carantec, Brittany, France    | LC107839        | LC107965        | LC107985        | LC108005        | LC108025        | LC108038        |
| <i>Microspongium stilophorae</i>                              | Siemer <i>et al.</i> (1998)          | Denmark                       | -               | -               | -               | -               | -               | AF055414        |
| <i>Mikrosyphar porphyrae</i>                                  | Siemer & Pedersen (only on database) | unknown                       | -               | -               | -               | -               | -               | AF207806        |
| <i>Myriactula clandestina</i>                                 | Silberfeld <i>et al.</i> (2014)      | unknown                       | -               | -               | -               | -               | -               | JF796587        |
| <i>Myriogloea simplex</i>                                     | Kawai <i>et al.</i> (2019b, c)       | Ehime, Japan                  | LC382487        | LC382495        | LC382503        | LC424529        | LC382518        | LC382526        |
| <i>Myrionema papillosum</i>                                   | Silberfeld <i>et al.</i> (2014)      | unknown                       | JF796544        | -               | JF796636        | JF796605        | JF796620        | JF796588        |
| <i>Myrionema strangulans</i>                                  | Siemer <i>et al.</i> (1998)          | Frederikshavn, Denmark        | -               | -               | -               | -               | -               | AF055407        |
| <i>Myriotrichia clavaeformis</i>                              | Siemer <i>et al.</i> (1998)          | Frederikshavn, Denmark        | -               | -               | -               | -               | -               | AF055408        |
| <i>Nemacystus decipiens</i>                                   | Kawai <i>et al.</i> (2019b)          | Ishikawa, Japan               | LC382489        | LC382497        | LC382505        | LC382512        | LC382520        | LC382528        |
| <i>Neoleptonema</i> sp.                                       | Tanaka <i>et al.</i> (2010)          | Shimoda, Shizuoka, Japan      | -               | -               | -               | -               | -               | AB302312        |
| <i>Papenfussiella kuromo</i>                                  | Kawai <i>et al.</i> (2016)           | Ofunato, Iwate, Japan         | LC107840        | LC107966        | LC107986        | LC108006        | LC108026        | -               |
|                                                               | Tanaka <i>et al.</i> (2010)          | Fukaura, Aomori, Japan        | -               | -               | -               | -               | -               | AB302314        |
| <i>Punctaria latifolia</i> Greville                           | Kawai <i>et al.</i> (2019a)          | Pardelas, Argentina           | LC205696        | LC205700        | LC205704        | LC205710        | LC205713        | LC205715        |
| <i>Punctaria plantaginea</i>                                  | Siemer <i>et al.</i> (1998)          | Godthab, Greenland, Denmark   | -               | -               | -               | -               | -               | AF055410        |
| <i>Saundersella</i> sp.                                       | Kawai <i>et al.</i> (2016)           | Abashiri, Hokkaido, Japan     | LC107841        | LC016536        | LC107987        | LC108007        | LC108027        | LC016519        |
| <i>Sauvageaugloia divaricata</i>                              | Kawai <i>et al.</i> (2016)           | Porz Liogan, Brittany, France | LC107842        | LC107967        | LC107988        | LC108008        | LC108028        | LC108039        |
| <b><i>Setoutiphycus delamareoides</i> gen. &amp; sp. nov.</b> | Isotype: KU-d17418                   | Suo-Oshima, Yamaguchi, Japan  | <b>LC603791</b> | <b>LC603794</b> | <b>LC603798</b> | <b>LC603801</b> | <b>LC603804</b> | <b>LC603808</b> |
|                                                               | Holotype: SAP115639 (=KU-d17417)     | Suo-Oshima, Yamaguchi, Japan  | -               | <b>LC603795</b> | -               | -               | -               | -               |
| <i>Soranthera ulvoidea</i>                                    | Silberfeld <i>et al.</i> (2014)      | unknown                       | -               | -               | -               | -               | -               | JF796589        |
| <i>Sphaerotrichia divaricata</i>                              | Siemer <i>et al.</i> (1998)          | Falshoft, Gelting, Germany    | -               | -               | -               | -               | -               | AF055412        |
| <i>Stictyosiphon soriferus</i>                                | Kawai <i>et al.</i> (2013)           | Bergen, Norway                | -               | -               | -               | -               | -               | AB775343        |
| <i>Stilophora tenella</i>                                     | Kawai <i>et al.</i> (2019a)          | Dorset, England, UK           | LC201533        | LC201584        | LC205705        | LC201545        | LC201553        | LC201559        |

|                                    |                                                  |                               |          |          |          |          |          |          |
|------------------------------------|--------------------------------------------------|-------------------------------|----------|----------|----------|----------|----------|----------|
| <i>Striaria attenuata</i>          | KU-d17414                                        | Suo-Oshima, Yamaguchi, Japan  | LC603792 | LC603796 | LC603799 | LC603802 | LC603805 | LC603809 |
| <i>Tinocladia crassa</i>           | Kawai <i>et al.</i> (2016, 2019a)                | Nomozaki, Nagaki, Japan       | LC205697 | LC107970 | LC107990 | LC108009 | LC108030 | LC382529 |
| <i>Trachynema groenlandicum</i>    | Kawai <i>et al.</i> (2016)                       | Muroran, Hokkaido, Japan      | LC107844 | LC016539 | LC107991 | LC108010 | LC108031 | LC016521 |
| <i>Ulonema rhizophorum</i>         | Silberfeld <i>et al.</i> (2014)                  | unknown                       | -        | -        | -        | -        | -        | JF796592 |
| <i>Vimineoleathesia japonica</i>   | Kawai <i>et al.</i> (2016)                       | Shimamaki, Hokkaido, Japan    | LC107845 | LC107971 | LC107992 | LC108011 | LC108032 | -        |
|                                    | Tanaka <i>et al.</i> (2010)                      | Shimamaki, Hokkaido, Japan    | -        | -        | -        | -        | -        | AB302284 |
| <b>Ectocarpaceae</b>               |                                                  |                               |          |          |          |          |          |          |
| <i>Ectocarpus</i> sp.              | Cock <i>et al.</i> (2010)                        | San Juan de Marcona, Peru     | FP885846 | FP885846 | -        | -        | -        | -        |
|                                    | Le Corguille <i>et al.</i> (2009)                | San Juan de Marcona, Peru     | -        | -        | FP102296 | FP102296 | FP102296 | FP102296 |
| <i>Kuckuckia spinosa</i>           | Kawai <i>et al.</i> (2015)                       | Villefranche-sur-Mer, France  | -        | -        | -        | -        | -        | AB899287 |
| <i>Pleurocladia lacustris</i>      | SAG 25.93; Wang <i>et al.</i> (only in database) | River Fischs-Dagnitz, Austria | -        | -        | -        | -        | -        | KU164872 |
| <i>Spongonema tomentosum</i>       | Bringloe <i>et al.</i> (2019)                    | Hordaland, Norway             | -        | -        | -        | -        | -        | MN184545 |
| <b>Petrospongiaceae</b>            |                                                  |                               |          |          |          |          |          |          |
| <i>Petrospongium rugosum</i>       | Cho & Boo (2006)                                 | Jejudo, Korea                 | -        | -        | -        | -        | -        | AY996361 |
| <b>Scytosiphonaceae</b>            |                                                  |                               |          |          |          |          |          |          |
| <i>Chnoospora minima</i>           | Kogame <i>et al.</i> (2011)                      | Lanai, HI, USA                | -        | -        | -        | -        | -        | AB578987 |
| <i>Colpomenia sinuosa</i>          | Kogame <i>et al.</i> (1999)                      | Kasumi, Hyogo, Japan          | -        | -        | -        | -        | -        | AB022234 |
| <i>Dactylosiphon bullosus</i>      | Hanyuda <i>et al.</i> (2020)                     | Kirikiri, Iwate, Japan        | -        | -        | -        | -        | -        | LC472403 |
| <i>Hapterophycus canaliculatus</i> | Kogame <i>et al.</i> (1999)                      | Oshoro, Hokkaido, Japan       | -        | -        | -        | -        | -        | AB022239 |
| <i>Hydroclathrus clathratus</i>    | Hanyuda <i>et al.</i> (2020)                     | Shibushi, Kagoshima, Japan    | -        | -        | -        | -        | -        | LC472404 |
| <i>Iyengaria stellata</i>          | Santiañez <i>et al.</i> (2020)                   | Doha, Kuwait Bay, Kuwait      | -        | -        | -        | -        | -        | MN587741 |
| <i>Melanosiphon intestinalis</i>   | Hanyuda <i>et al.</i> (2020)                     | Shizunai, Hokkaido, Japan     | -        | -        | -        | -        | -        | LC472401 |
| <i>Myelophycus simplex</i>         | Hanyuda <i>et al.</i> (2020)                     | Kada, Wakayama, Japan         | -        | -        | -        | -        | -        | LC472397 |
| <i>Petalonia fascia</i>            | Hanyuda <i>et al.</i> (2020)                     | Kamaishi, Iwate, Japan        | -        | -        | -        | -        | -        | LC472405 |
| <i>Planosiphon gracilis</i>        | Hanyuda <i>et al.</i> (2020)                     | Misaki, Osaka, Japan          | -        | -        | -        | -        | -        | LC472406 |
| <i>Pseudochnoospora implexa</i>    | Kogame <i>et al.</i> (1999)                      | Sesoko, Okinawa, Japan        | -        | -        | -        | -        | -        | AB022231 |

|                               |                                |                              |   |   |   |   |   |          |
|-------------------------------|--------------------------------|------------------------------|---|---|---|---|---|----------|
| <i>Rosenvingeia intricata</i> | Kogame <i>et al.</i> (1999)    | Gushikawa, Okinawa,<br>Japan | - | - | - | - | - | AB022232 |
| <i>Scytosiphon lomentaria</i> | Kogame <i>et al.</i> (1999)    | Oshoro, Hokkaido, Japan      | - | - | - | - | - | AB022238 |
| <i>Tronoella ryukyuana</i>    | Santiañez <i>et al.</i> (2020) | Itoman, Okinawa, Japan       | - | - | - | - | - | MF431947 |

---

## References of Supplementary Information 2

- Bringloe, T. T., Sjøtun, K. & Saunders, G. W. A DNA barcode survey of marine macroalgae from Bergen (Norway). *Mar. Biol. Res.* **15**, 580–589. (2019).
- Cho, G. Y. & Boo, S. M. Phylogenetic position of *Petrospongium rugosum* (Ectocarpales, Phaeophyceae): insights from the protein-coding plastid *rbcL* and *psaA* gene sequences. *Cryptogam. Algal.* **27**, 3–15. (2006).
- Cock, J. M., Sterck, L., Rouze, P. *et al.* The *Ectocarpus* genome and the independent evolution of multicellularity in brown algae. *Nature* **465**, 617–621. (2010).
- Hanyuda, T., Takeuchi, K. & Kawai, H. *Tinocladia sanrikuensis* sp. nov. (Ectocarpales s.l., Phaeophyceae) from Japan. *Phycol. Res.* **67**, 221–227. (2019).
- Hanyuda, T., Aoki, S. & Kawai, H. Reinstatement of *Myelophycus caespitosus* (Scytosiphonaceae, Phaeophyceae) from Japan. *Phycol. Res.* **68**, 126–134 (2020).
- Kawai, H., Hanyuda, T., Ridgway, L. M. & Holser, K. Ancestral reproductive structure in basal kelp *Aureophycus aleuticus*. *Sci. Rep.* **3**, 2491. (2013).
- Kawai, H., Hanyuda, T., Draisma, S. G., Wilce, R. T. & Andersen, R. A. Molecular phylogeny of two unusual brown algae, *Phaeostrophion irregulare* and *Platysiphon glacialis*, Stschapoviales ord. nov. and Platysiphonaceae fam. nov., and a re-examination of divergence times for brown algal orders. *J. Phycol.* **51**, 918–928. (2015).
- Kawai, H., Hanyuda, T., Kim, S.-H., Ichikawa, Y., Uwai, S. & Peters, A. F. *Cladosiphon takenoensis* sp. nov. (Ectocarpales s.l., Phaeophyceae) from Japan. *Phycol. Res.* **64**, 212–218. (2016).
- Kawai, H., Hanyuda, T., Sun, Z., Barbara, I. & Peters, A. F. Taxonomic revision of *Eudesme* (Ectocarpales s.l., Phaeophyceae) proposing a new species *E. borealis* sp. nov. *Phycologia* **58**, 351–358. (2019a).
- Kawai, H., Hanyuda, T., Shibata, K., Kamiya, M. & Peters, A. F. Proposal of a new brown algal species, *Mesogloia japonica* sp. nov. (Chordariaceae, Phaeophyceae), and transfer of *Sauvageaugloia ikomae* to *Mesogloia*. *Phycologia* **58**, 63–69. (2019b).
- Kogame, K., Horiguchi, T. & Masuda, M. Phylogeny of the order Scytosiphonales (Phaeophyceae) based on DNA sequences of *rbcL*, partial *rbcS*, and partial LSU nrDNA. *Phycologia* **38**, 496–502. (1999).



- Le Corguillé, G., Pearson, G., Valente, M. *et al.* Plastid genomes of two brown algae, *Ectocarpus siliculosus* and *Fucus vesiculosus*: further insights on the evolution of red-algal derived plastids. *BMC Evol. Biol.* **9**, 253–266. (2009).
- Peters, A. F. Molecular identification, distribution and taxonomy of brown algal endophytes, with emphasis on species from Antarctica. *Proc. Int. Seaweed Symp.* **17**, 293–302. (2003).
- Peters, A. F. & Ramírezb, M. E. Molecular phylogeny of small brown algae, with special reference to the systematic position of *Caepidium antarcticum* (Adenocystaceae, Ectocarpales). *Cryptogam. Algal.* **22**, 187–200. (2001).
- Santiañez, W. J. E., Lee, K. M., Uwai, S., Kurihara, A., Geraldino, P. J. L., Ganzon-Fortes, E. T., Boo, S. M. & Kogame, K. Untangling nets: elucidating the diversity and phylogeny of the clathrate brown algal genus *Hydroclathrus*, with the description of a new genus *Tronoella* (Scytosiphonaceae, Phaeophyceae). *Phycologia* **57**, 61–78. (2020).
- Siemer, B. L., Stam, W. T., Olsen, J. L. & Pedersen, P. M. Phylogenetic relationships of the brown algal orders Ectocarpales, Chordariales, Dictyosiphonales, and Tilopteridales (Phaeophyceae) based on Rubisco large subunit and spacer sequences. *J. Phycol.* **34**, 1038–1048. (1998).
- Silberfeld, T., Rousseau, F. & de Reviers, B. An updated classification of brown algae (Ochrophyta, Phaeophyceae). *Cryptogam. Algal.* **35**, 117–156. (2014).
- Tanaka, A., Uwai, S., Nelson, W. & Kawai, H. *Phaeophysema* gen. nov. and *Vimineoleathesia* gen. nov., new brown algal genera for the minute Japanese members of the genus *Leathesia*. *Eur. J. Phycol.* **45**, 109–117. (2010).
- Uwai, S., Nagasato, C., Motomura, T. & Kogame, K. Life history and molecular phylogenetic relationships of *Asterocladon interjectum* sp. nov. (Phaeophyceae). *Eur. J. Phycol.* **40**, 179–194. (2005).
- Yaegashi, K., Yamagishi, Y., Uwai, S., Abe, T., Santiañez, W. J. E. & Kogame, K. Two species of the genus *Acinetospora* (Ectocarpales, Phaeophyceae) from Japan: *A. filamentosa* comb. nov. and *A. asiatica* sp. nov. *Bot. Mar.* **58**, 331–343. (2015).

### Supplementary information 3. List of primers used for polymerase chain reaction (PCR) and sequencing

| Code       | F/R | Sequence (5'-3')             | Region      | Reference                       |
|------------|-----|------------------------------|-------------|---------------------------------|
| ycf3-F1P   | F   | CAAGCDYTAAATAATATWGCTG       | <i>ycf3</i> | Kawai <i>et al.</i> (2013)      |
| atpB-F1.3P | F   | GTHMGHGCNATTGCNATGAGTGC      | <i>atpB</i> | Kawai <i>et al.</i> (2013)      |
| atpB-2R    | R   | AGCTTGWACAAATCTAAAAATA       | <i>atpB</i> | Silberfeld <i>et al.</i> (2010) |
| atpB-R1P   | R   | TTTGCTTTAGMDATWGCTTC         | <i>atpB</i> | Kawai <i>et al.</i> (2013)      |
| psaA130F   | F   | AACWACWACTTGGATTTGGAA        | <i>psaA</i> | Yoon <i>et al.</i> (2002)       |
| psaA970R2  | R   | TRCTATGDCCRATNCCCCAA         | <i>psaA</i> | Kawai <i>et al.</i> (2013)      |
| psaA1760R2 | R   | CCRTCACAHGGRAAWCGGAA         | <i>psaA</i> | Kawai <i>et al.</i> (2013)      |
| psaA1760R  | R   | CCTCTWCCWGGWCCATCRCAWGG      | <i>psaA</i> | Yoon <i>et al.</i> (2002)       |
| psaA-P4    | R   | NGATTCAATHARYTCTTGCC         | <i>psaA</i> | Kawai <i>et al.</i> (2012)      |
| psbA-F2    | F   | GCAACTTTAGAAAGACGCGA         | <i>psbA</i> | Yoon <i>et al.</i> (2002)       |
| psbA500F   | F   | CTCTGATGGWATGCCWYTAGG        | <i>psbA</i> | Yoon <i>et al.</i> (2002)       |
| psbA600R   | R   | CCAAATACACCAGCAACACC         | <i>psbA</i> | Yoon <i>et al.</i> (2002)       |
| psbA-R1.2  | R   | YYWGAWGCTAAATCTAATGGG        | <i>psbA</i> | Kawai <i>et al.</i> (2018)      |
| rbcL-P2    | F   | GAWCGRACCTCGAWTWAAAAGTG      | <i>rbcL</i> | Kawai <i>et al.</i> (2007)      |
| rbcL-P2.2  | F   | CTCGAWTWAAAAGTGAVCGWTAYGAATC | <i>rbcL</i> | Kawai <i>et al.</i> (2012)      |
| rbcL-Rh3   | F   | TTAAYTCTCARCCDTTYATGCG       | <i>rbcL</i> | Hanyuda <i>et al.</i> (2004)    |
| Ral-R952   | R   | CATACGCATCCATTTACA           | <i>rbcL</i> | Kawai <i>et al.</i> (2007)      |
| rbcS-P1    | R   | GGATCATCTGYCCATTCTACAC       | <i>rbcS</i> | Kawai <i>et al.</i> (2007)      |
| GazF2      | F   | CCAACCAYAAAAGATATWGGTAC      | <i>cox1</i> | Lane <i>et al.</i> (2007)       |
| cox1-P1.2  | F   | GATHTTYTTTATGGTDATGCC        | <i>cox1</i> | Kawai <i>et al.</i> (2013)      |
| GazR2      | R   | GGATGACCAAARAACCAAA          | <i>cox1</i> | Lane <i>et al.</i> (2007)       |
| cox1-P3    | R   | CNGTAAACATRTGRTGVGCC         | <i>cox1</i> | Kawai <i>et al.</i> (2013)      |
| cox1-P2    | R   | GGDATAACGDCGHGGCATACC        | <i>cox1</i> | Kawai <i>et al.</i> (2013)      |
| trnI-P1.3  | R   | AACTCTACCRCTGAGTTAC          | <i>trnI</i> | This study                      |
| trnI-P1.2  | R   | GCTTATCAGGCGTACACTCT         | <i>trnI</i> | Kawai <i>et al.</i> (2013)      |
| trnI-P1    | R   | TTGAACGAWCGVCTTTACGC         | <i>trnI</i> | Kawai <i>et al.</i> (2013)      |
| trnY-P2    | F   | GKCAGATTGTAAATCTGTTGG        | <i>trnY</i> | Kawai <i>et al.</i> (2012)      |
| trnY-P1    | F   | TCYATCRTAGGTTCGAATCC         | <i>cox3</i> | Ni-Ni-Win <i>et al.</i> (2008)  |
| cox3-P2    | R   | ACAAARTGCCAATACCAAGC         | <i>cox3</i> | Ni-Ni-Win <i>et al.</i> (2008)  |

## Reference for Supplementary information 3.

- Hanyuda, T., Suzawa, Y., Suzawa, T., Arai, S., Sato, H., Ueda, K. & Kumano, S. Biogeography and taxonomy of *Batrachospermum helminthosum* Bory (Batrachospermales, Rhodophyta) in Japan inferred from *rbcL* gene sequences. *J. Phycol.* **40**, 581–588. (2004).
- Kawai, H., Hanyuda, T., Draisma, S. G. A. & Müller, D. G. 2007. Molecular phylogeny of *Discosporangium mesarthrocarpum* (Phaeophyceae) with a reassessment of the Discosporangiales. *J. Phycol.* **43**, 186–194. (2007).
- Kawai, H., Kogishi, K., Hanyuda, T. & Kitayama, T. Taxonomic revision of the genus *Cutleria* proposing a new genus *Mutimo* to accommodate *M. cylindrica* (Cutleriaceae, Phaeophyceae). *Phycol. Res.* **60**, 241–248. (2012).
- Kawai, H., Hanyuda, T., Ridgway, L. M. & Holser, K. Ancestral reproductive structure in basal kelp *Aureophycus aleuticus*. *Sci. Rep.* **3**, 2491. (2013).
- Lane, C. E., Lindstrom, S. C. & Saunders, G. W. A molecular assessment of northeast Pacific *Alaria* species (Laminariales, Phaeophyceae) with reference to the utility of DNA barcoding. *Mol. Phylog. Evol.* **44**, 634–648. (2007).
- Ni-Ni-Win, Hanyuda, T., Arai, S., Uchimura, M., Abbott, I. A. & Kawai, H. Three new records of *Padina* in Japan based on morphological and molecular markers. *Phycol. Res.* **56**, 288–300. (2008).
- Silberfeld, T., Leigh, J. W., Verbruggen, H., Cruaud, C., de Reviers, B. & Rousseau, F. 2010. A multi-locus time-calibrated phylogeny of the brown algae (Heterokonta, Ochrophyta, Phaeophyceae): investigating the evolutionary nature of the “brown algal crown radiation”. *Mol. Phylogen. Evol.* **56**, 659–674. (2010).
- Yoon, H. S., Hackett, J. D. & Bhattacharya, D. A single origin of the peridinin- and fucoxanthin-containing plastids in dinoflagellates through tertiary endosymbiosis. *Proc. Natl. Acad. Sci. U.S.A.* **99**, 11724–11729. (2002).

**Supplementary Information 4. Sequence divergence (p-distance) of *rbcL* gene between representative genera within selected brown algal orders.**

| Genera compared within each order /<br>number of genera in each order                                                                                                                                | p-distance | Species and DNA database codes                                                                                                                                                                                                                                                                                |
|------------------------------------------------------------------------------------------------------------------------------------------------------------------------------------------------------|------------|---------------------------------------------------------------------------------------------------------------------------------------------------------------------------------------------------------------------------------------------------------------------------------------------------------------|
| <b>Dictyotales</b> ( <i>Dictyota</i> , <i>Exallosorus</i> ,<br><i>Padina</i> and <i>Stypopodium</i> ) / 20                                                                                           | −0.127     | <i>Dictyota crenulata</i> (GU290253)<br><i>Exallosorus olsenii</i> (DQ866923)<br><i>Padina japonica</i> (AB358910)<br><i>Stypopodium schimperi</i> (DQ866926)                                                                                                                                                 |
| <b>Ectocarpales s.l.</b> ( <i>Acinetospora</i> ,<br><i>Adenocystis</i> , <i>Ectocarpus</i> ,<br><i>Petrospongium</i> , <i>Scytosiphon</i> ,<br><i>Setoutiphycus</i> and <i>Stictyosiphon</i> ) / 139 | −0.092     | <i>Acinetospora asiatica</i> (LC060517)<br><i>Adenocystis utricularis</i> (AJ295823)<br><i>Ectocarpus</i> sp. (FP102296)<br><i>Petrospongium rugosum</i> (AY996361)<br><i>Scytosiphon lomentaria</i> (AB022238)<br><i>Setoutiphycus delamareoides</i> (LC603808)<br><i>Stictyosiphon soriferus</i> (AB775343) |
| <b>Fucales</b> ( <i>Fucus</i> , <i>Hormosira</i> ,<br><i>Phyllospora</i> and <i>Sargassum</i> ) / 50                                                                                                 | −0.101     | <i>Fucus vesiculosus</i> (FM957154)<br><i>Hormosira banksii</i> (AB776774)<br><i>Phyllospora comosa</i> (EF990249)<br><i>Sargassum muticum</i> (AB776776)                                                                                                                                                     |
| <b>Ishigeales</b> ( <i>Diplura</i> , <i>Ishige</i> and<br><i>Petroderma</i> ) / 3                                                                                                                    | −0.163     | <i>Diplura simplex</i> (AB250084)<br><i>Ishige okamurai</i> (AY372974)<br><i>Petroderma maculiforme</i> (EU579934)                                                                                                                                                                                            |
| <b>Chordales</b> ( <i>Akkesiphycus</i> , <i>Chorda</i> and<br><i>Pseudochorda</i> ) / 3                                                                                                              | −0.080     | <i>Akkesiphycus lubricum</i> (AB036038)<br><i>Chorda asiatica</i> (AB775335)<br><i>Pseudochorda nagaii</i> (AB775342)                                                                                                                                                                                         |
| <b>Laminariales</b> ( <i>Aureophycus</i> ,<br><i>Macrocystis</i> , <i>Neoagarum</i> and <i>Undaria</i> )<br>/ 33                                                                                     | −0.082     | <i>Aureophycus aleuticus</i> (AB355025)<br><i>Macrocystis pyrifera</i> (AB775339)<br><i>Neoagarum oharaense</i> (LC148138)<br><i>Undaria pinnatifida</i> (AB775334)                                                                                                                                           |
| <b>Sphacelariales</b> ( <i>Bodanella</i> , <i>Halopteris</i> ,<br><i>Phaeostrophion</i> and <i>Sphacelaria</i> ) / 10                                                                                | −0.123     | <i>Bodanella lauterborni</i> (FM956110)<br><i>Halopteris gracilescens</i> (AB899291)<br><i>Phaeostrophion irregulare</i> (AB899292)<br><i>Sphacelaria radicans</i> (FM956112)                                                                                                                                 |
| <b>Sporochnales</b> ( <i>Bellotia</i> , <i>Carpomitra</i><br>and <i>Sporochnus</i> ) / 11                                                                                                            | −0.057     | <i>Bellotia eriophorum</i> (AB899295)<br><i>Carpomitra costata</i> (AB776780)<br><i>Sporochnus scoparius</i> (AB776781)                                                                                                                                                                                       |
| <b>Stschapoviales</b> ( <i>Halosiphon</i> ,<br><i>Platysiphon</i> and <i>Stschapovia</i> ) / 3                                                                                                       | −0.057     | <i>Halosiphon tomentosus</i> (AB545977)<br><i>Platysiphon glacialis</i> (AB776772)<br><i>Stschapovia flagellaris</i> (AB117920)                                                                                                                                                                               |
| <b>Tilopteridales</b> ( <i>Cutleria</i> , <i>Saccorhiza</i><br>and <i>Tilopteris</i> ) / 7                                                                                                           | −0.077     | <i>Cutleria adspersa</i> (AB545967)<br><i>Saccorhiza polyschides</i> (AB545978)<br><i>Tilopteris mertensii</i> (AB776784)                                                                                                                                                                                     |
